# Supplementary material for: Lack of kinase-independent activity of PI3Kγ in locus coeruleus induces ADHD symptoms through increased CREB signaling
Source: PubMed Central journal article supplement (PMC4520656; doi:10.15252/emmm.201404697), 2015-04-16
Supplement: emmm0007-0904-sd15.pdf [file emmm0007-0904-sd15.pdf]

**Table S3. Example of a complete attention set-shifting task**

---

DIGGING MEDIA

---

| <b>Day</b> | <b>Stage</b>                  | <b>Rewarded stimuli</b> | <b>Non-rewarded stimuli</b> |
|------------|-------------------------------|-------------------------|-----------------------------|
| 1          | Simple discrimination -- SD   | Sawdust                 | Cotton                      |
| 2          | Compound discrimination -- CD | Sawdust                 | Cotton                      |
| 2          | CD reversal -- CDR            | Cotton                  | Sawdust                     |
| 3          | Intra-dimensional shift --IDS | Shredded paper          | Confetti                    |
| 3          | IDS reversal --IDSR           | Confetti                | Shredded paper              |
| 4          | Extra-dimensional shift --EDS | Rosmary                 | Cumin                       |
| 4          | EDS reversal -- EDSR          | Cumin                   | Rosmary                     |

---

## ODOUR

---

| <b>Day</b> | <b>Stage</b>                  | <b>Rewarded stimuli</b> | <b>Non-rewarded stimuli</b> |
|------------|-------------------------------|-------------------------|-----------------------------|
| 1          | Simple discrimination -- SD   | Cinnamon                | Sage                        |
| 2          | Compound discrimination -- CD | Cinnamon                | Sage                        |
| 2          | CD reversal -- CDR            | Sage                    | Cinnamon                    |
| 3          | Intra-dimensional shift --IDS | Oregano                 | Thymus                      |
| 3          | IDS reversal --IDSR           | Thymus                  | Oregano                     |
| 4          | Extra-dimensional shift --EDS | Wood shavings           | Sand                        |
| 4          | EDS reversal -- EDSR          | Sand                    | Wood shavings               |

---
